# Supplementary material for: High-performance gas sensor array for indoor air quality monitoring: the role of Au nanoparticles on WO3, SnO2, and NiO-based gas sensors
Source: Royal Society of Chemistry journal article supplement (doi:10.1039/d0ta08743b), 2020-12-10
Supplement: d0ta08743b1.pdf [file d0ta08743b1.pdf]

Supplementary information

## High-performance Gas Sensor Array for Indoor Air Quality Monitoring: The Role of Au Nanoparticles in WO<sub>3</sub>, SnO<sub>2</sub>, and NiO-based Gas Sensors

Jinho Lee<sup>a‡</sup>, Youngmo Jung<sup>b‡</sup>, Seunghyeon Seong<sup>b</sup>, Gil-Ho Lee<sup>b</sup>, Jungmo Kim<sup>a</sup>, Seong Jin<sup>b</sup>, Young-Seok Shim<sup>\*c</sup>, Seong Chan Jeon<sup>\*b</sup>, Seokwoo Jeon<sup>\*a</sup>

<sup>a</sup>Department of Materials Science and Engineering, Korea Advanced Institute of Science and Technology (KAIST), Daejeon 34141, Republic of Korea. E-mail: jeon39@kaist.ac.kr

<sup>b</sup>School of Mechanical Engineering, Yonsei University, 50 Yonsei-ro, Seodaemun-gu, Seoul 03722, South Korea. E-mail: scj@yonsei.ac.kr

<sup>c</sup>Division of Materials Science & Engineering, Silla University, 140 Baegyong-daero 700beon-gil, Sasang-gu, Busan, Republic of Korea. E-mail: ysshim@silla.ac.kr

‡ These authors contributed equally

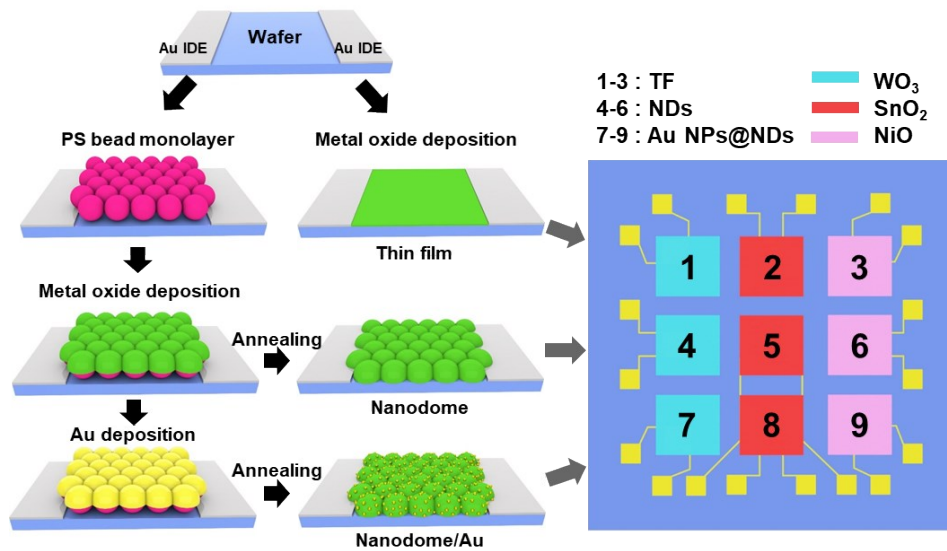

Fig. S1 Fabrication process of 3x3 gas sensor array

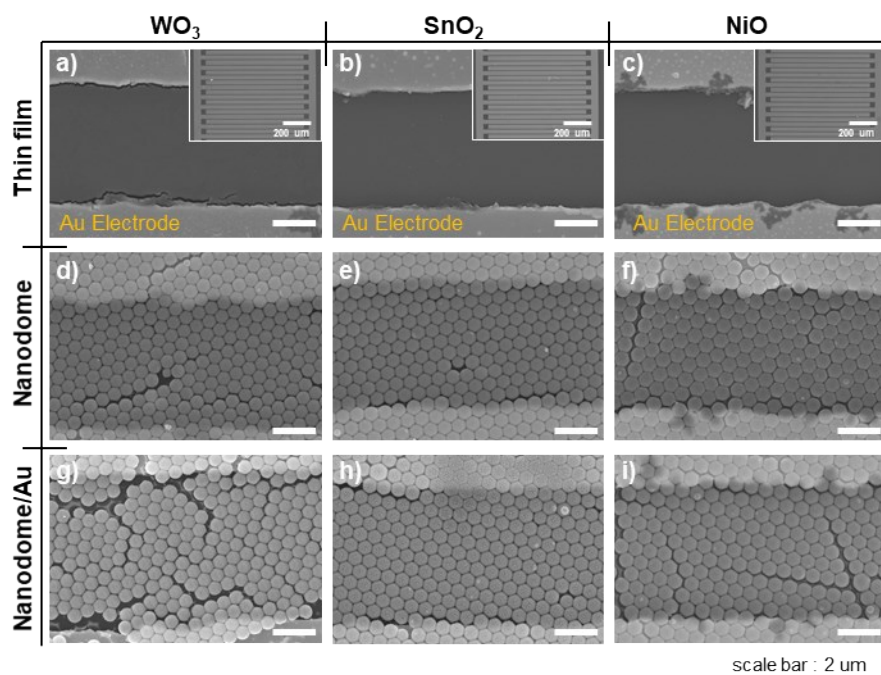

Fig. S2 SEM micrographs of the a-c) TF, d-f) NDs, g-i) Au NPs@ $\text{WO}_3$ ,  $\text{SnO}_2$  and  $\text{NiO}$  NDs. The inset image show the whole IDE substrate.

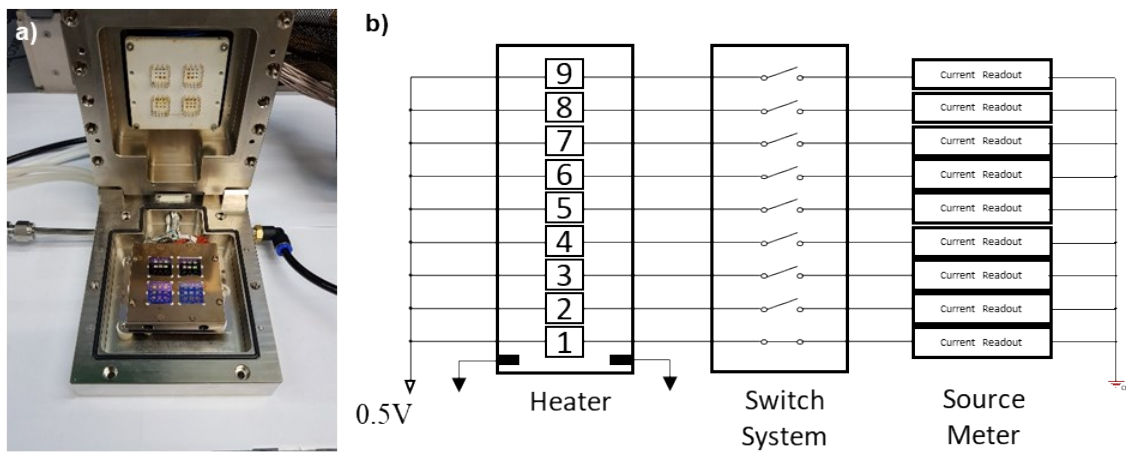

**Fig. S3** a) Digital image of the gas response measurement setup and the b) interface circuitry for the gas sensing measurements of the 3x3 sensor array.

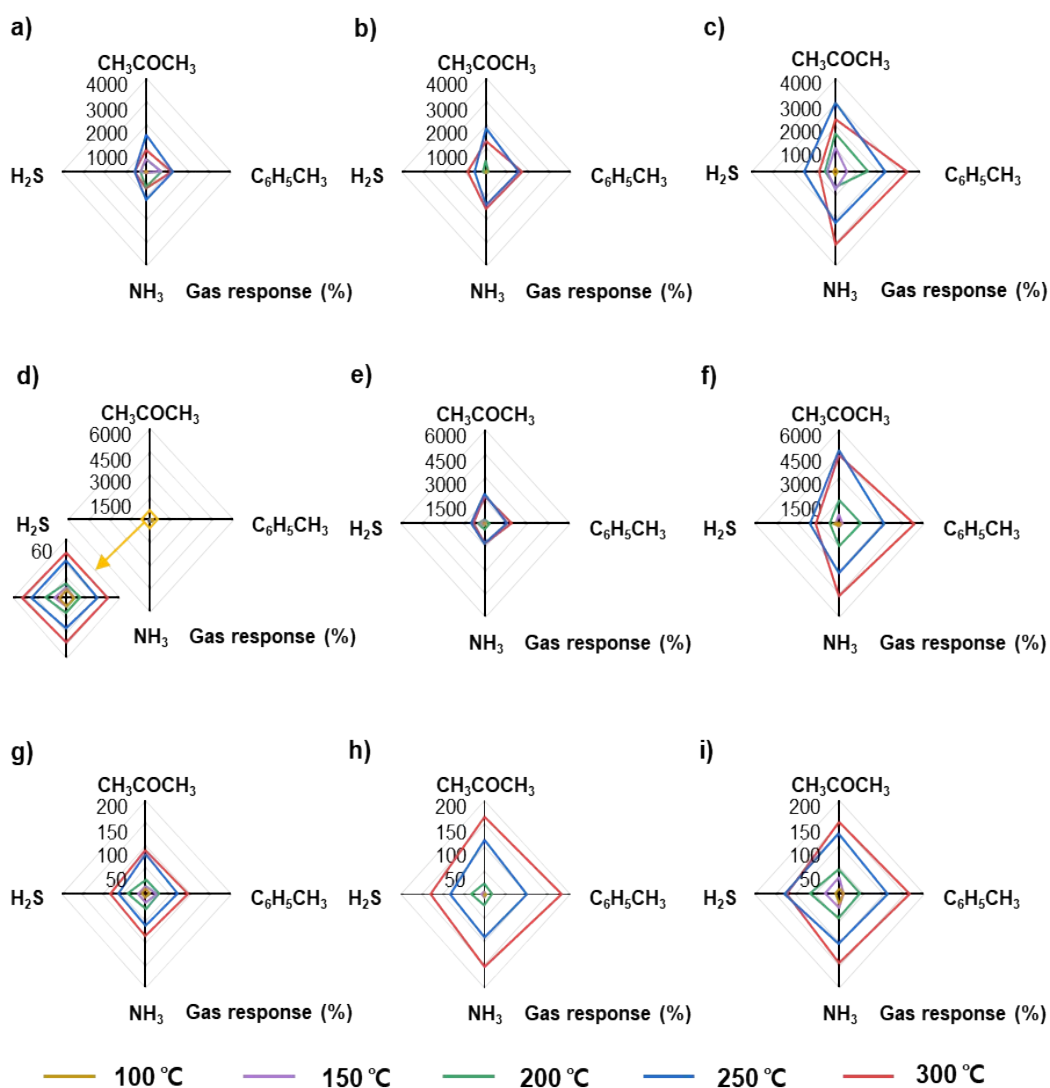

**Fig. S4** Polar plot of gas responses for a-c)  $\text{WO}_3$ , d-f)  $\text{SnO}_2$ , g-i)  $\text{NiO}$  TFs, NDs, and Au NPs@NDs as a function of temperature.



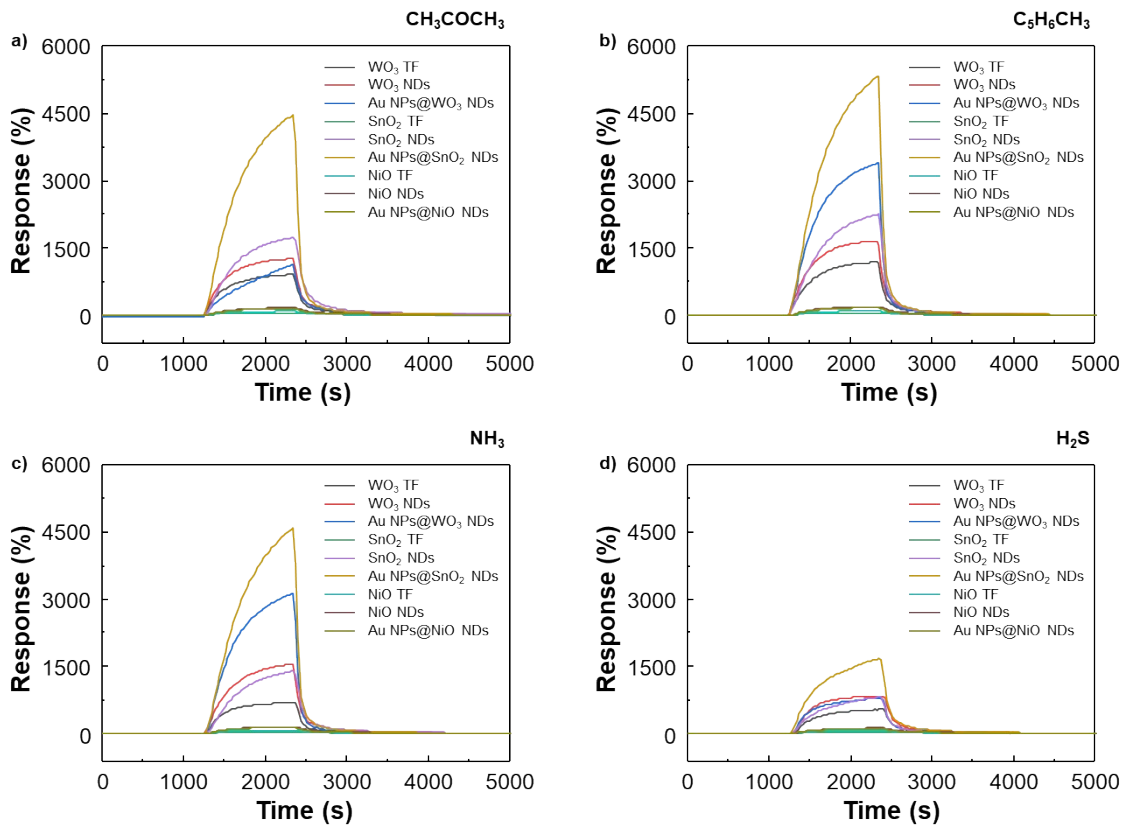

Fig. S5 Real-time response of the sensor array to 10 ppm a)  $\text{CH}_3\text{COCH}_3$ , b)  $\text{C}_6\text{H}_5\text{CH}_3$ , c)  $\text{NH}_3$  and d)  $\text{H}_2\text{S}$  at 300 °C.

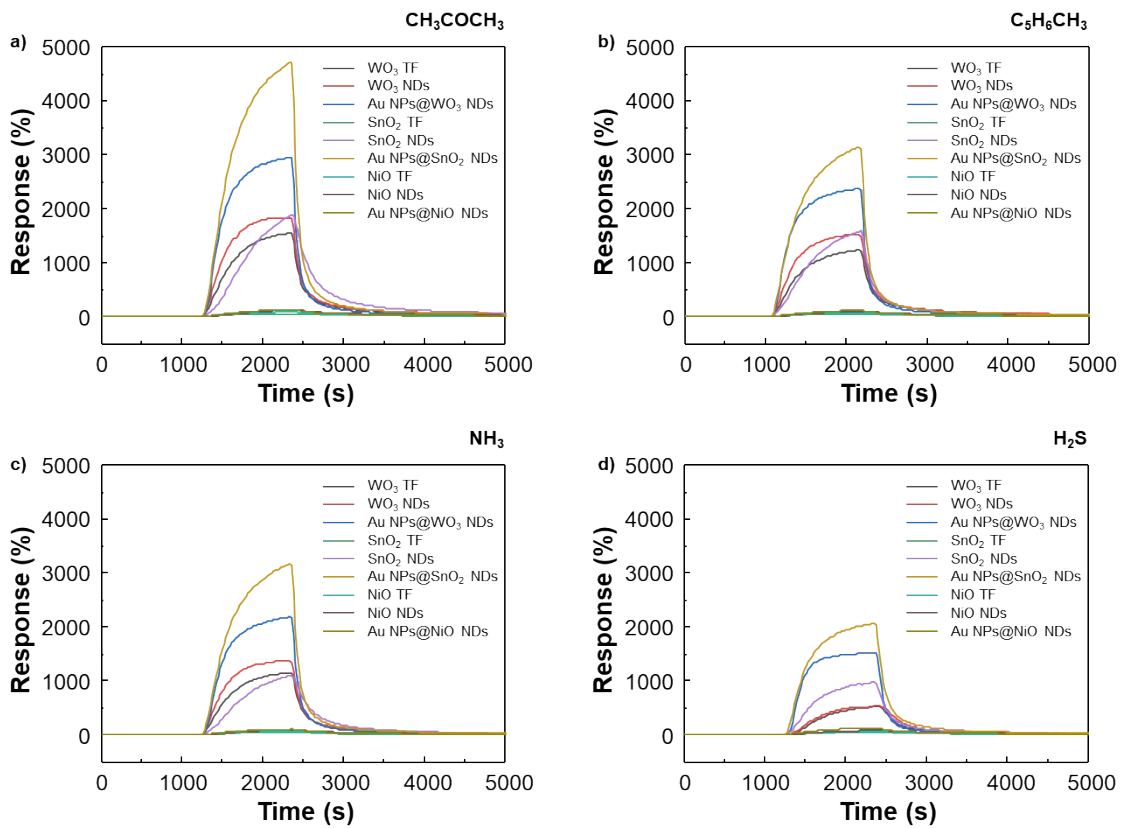

Fig. S6 Real-time response of the sensor array to 10 ppm a)  $\text{CH}_3\text{COCH}_3$ , b)  $\text{C}_6\text{H}_5\text{CH}_3$ , c)  $\text{NH}_3$  and d)  $\text{H}_2\text{S}$  at 250 °C.

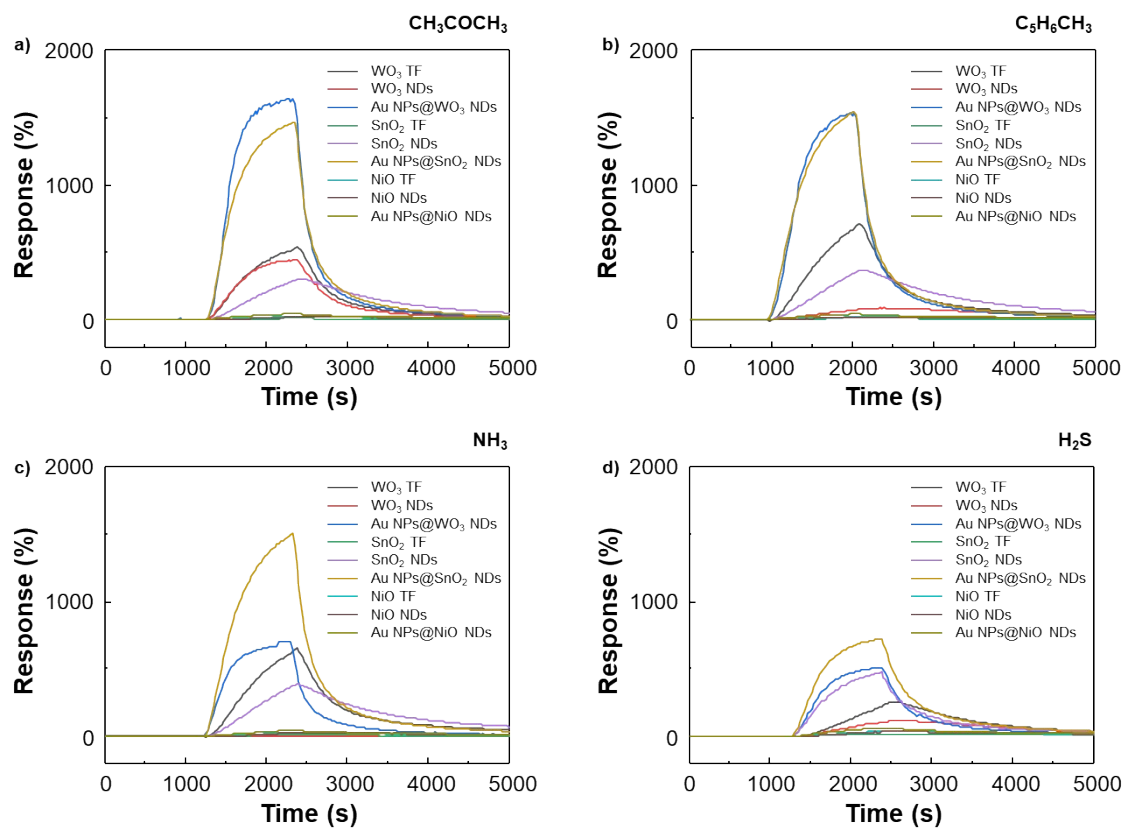

Fig. S7 Real-time response of the sensor array to 10 ppm a)  $\text{CH}_3\text{COCH}_3$ , b)  $\text{C}_6\text{H}_5\text{CH}_3$ , c)  $\text{NH}_3$  and d)  $\text{H}_2\text{S}$  at 200 °C.

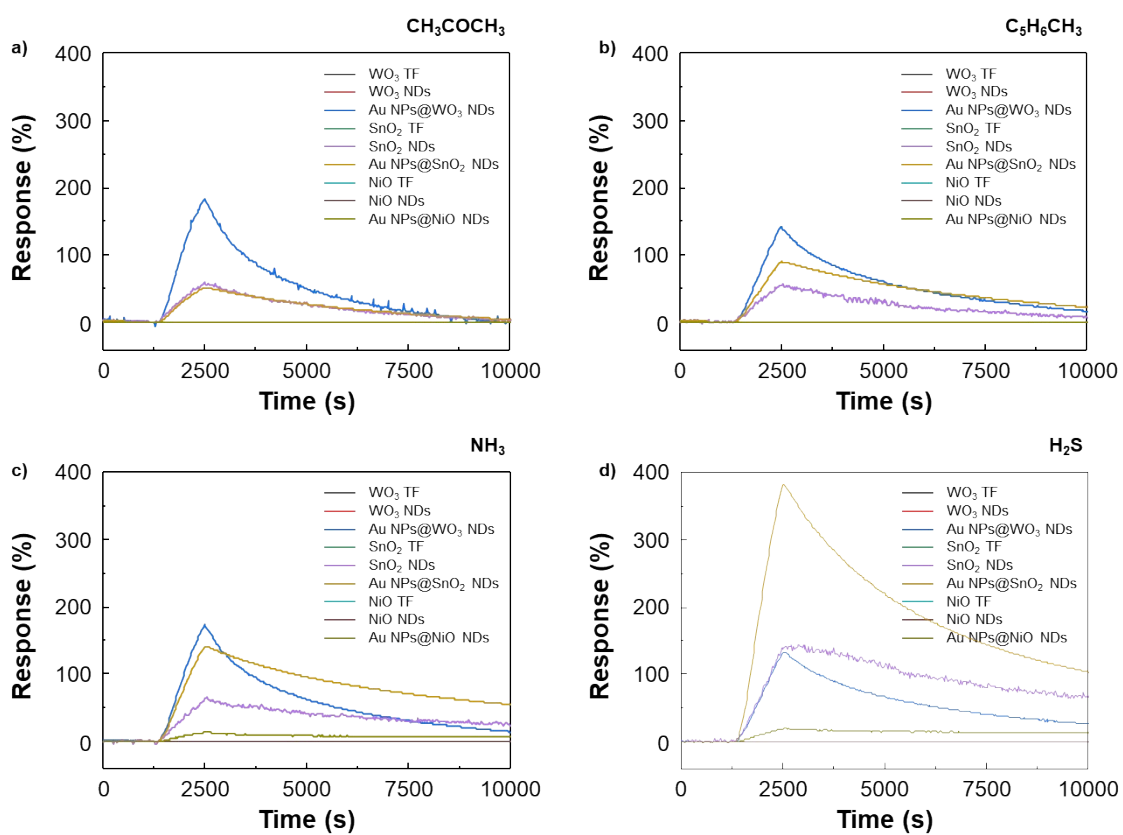

Fig. S8 Real-time response of the sensor array to 10 ppm a)  $\text{CH}_3\text{COCH}_3$ , b)  $\text{C}_6\text{H}_5\text{CH}_3$ , c)  $\text{NH}_3$  and d)  $\text{H}_2\text{S}$  at 150 °C.

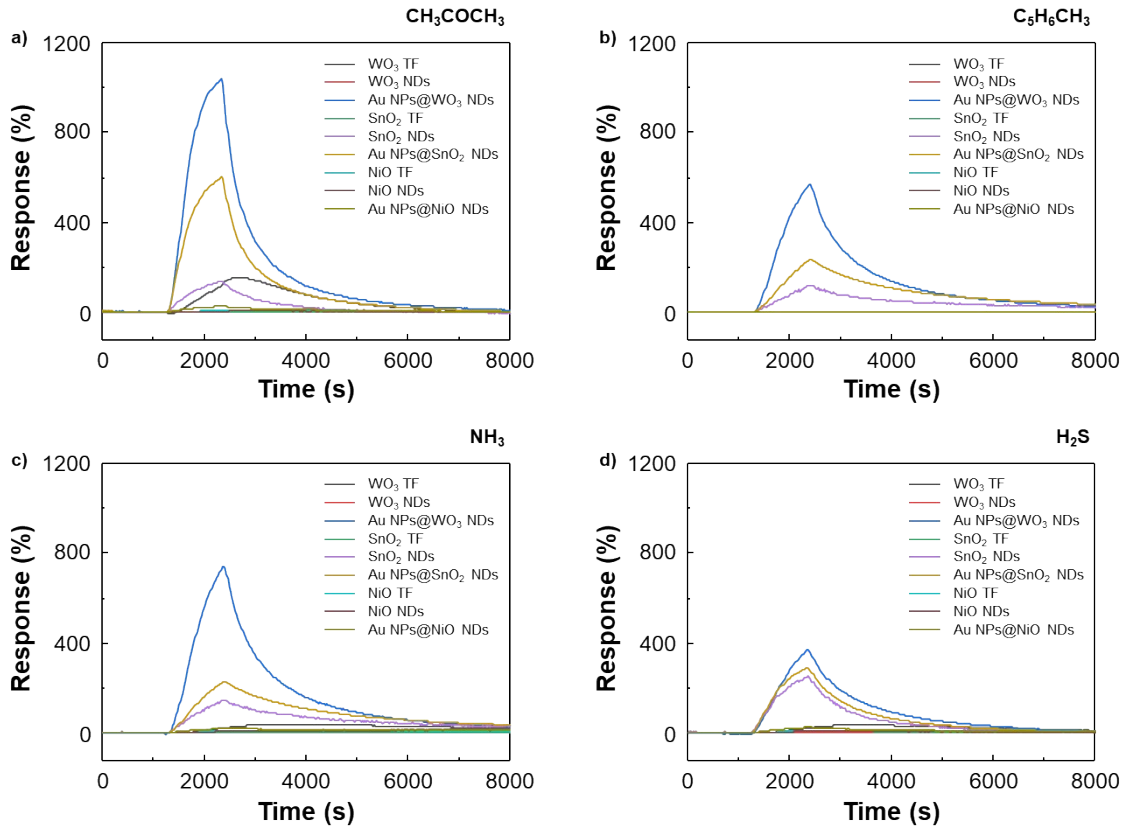

Fig. S9 Real-time response of the sensor array to 10 ppm a)  $\text{CH}_3\text{COCH}_3$ , b)  $\text{C}_6\text{H}_5\text{CH}_3$ , c)  $\text{NH}_3$  and d)  $\text{H}_2\text{S}$  at 100 °C

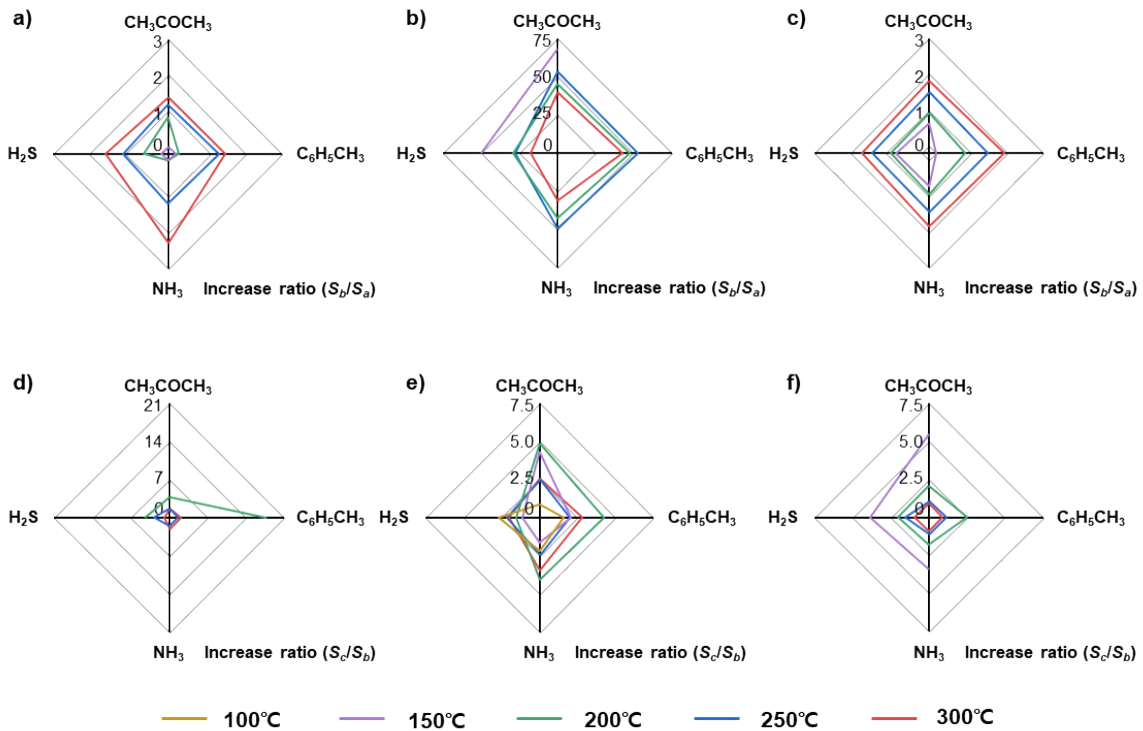

Fig. S10 Polar plots of the increase ratio ( $S_b/S_a$ ) between the response of TFs and the NDs of a)  $\text{WO}_3$ , b)  $\text{SnO}_2$ , and c)  $\text{NiO}$ . Polar plots of the increase ratio ( $S_c/S_b$ ) between the response of NDs and the Au NPs@NDs of d)  $\text{WO}_3$ , and e)  $\text{SnO}_2$ , f)  $\text{NiO}$ .  $S_a$ ,  $S_b$  and  $S_c$  represent the responses of the TFs and NDs and Au NPs@NDs.

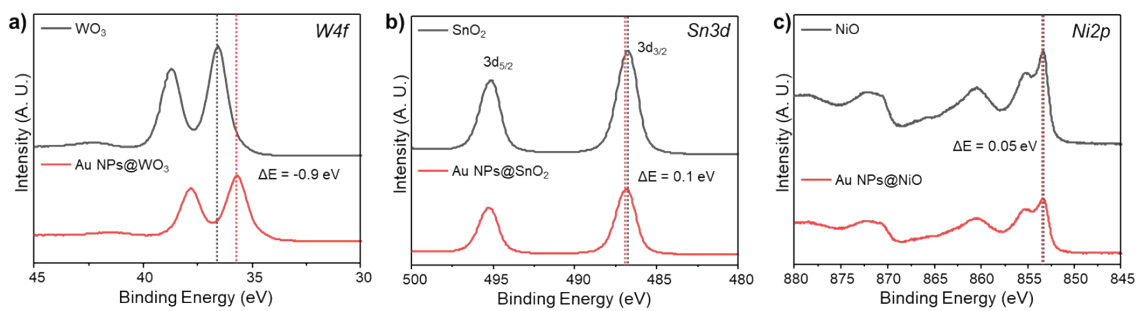

**Fig. S11** XPS spectra for a) W4f of  $\text{WO}_3$  and  $\text{Au NPs@WO}_3$ , b) Sn3d of  $\text{SnO}_2$  and  $\text{Au NPs@SnO}_2$  c) Ni2p of  $\text{NiO}$  and  $\text{Au NPs@NiO}$ .



| Gas                               | Metal oxide    | Type       | Resistance ( $\Omega$ )            |                    |                    |                    |                    |
|-----------------------------------|----------------|------------|------------------------------------|--------------------|--------------------|--------------------|--------------------|
|                                   |                |            | Temperature ( $^{\circ}\text{C}$ ) |                    |                    |                    |                    |
|                                   |                |            | 100                                | 150                | 200                | 250                | 300                |
| $\text{CH}_3\text{COCH}_3$        | $\text{WO}_3$  | TF         | -                                  | $2.62 \times 10^7$ | $2.05 \times 10^7$ | $1.64 \times 10^7$ | $4.60 \times 10^6$ |
|                                   |                | NDs        | -                                  | -                  | $9.07 \times 10^7$ | $7.92 \times 10^7$ | $2.48 \times 10^7$ |
|                                   |                | Au NPs@NDs | $5.86 \times 10^7$                 | $6.23 \times 10^7$ | $5.29 \times 10^7$ | $4.40 \times 10^7$ | $1.04 \times 10^7$ |
|                                   | $\text{SnO}_2$ | TF         | -                                  | $3.49 \times 10^2$ | $3.71 \times 10^2$ | $4.76 \times 10^2$ | $4.70 \times 10^2$ |
|                                   |                | NDs        | $2.45 \times 10^6$                 | $3.18 \times 10^6$ | $1.69 \times 10^4$ | $6.90 \times 10^4$ | $5.10 \times 10^4$ |
|                                   |                | Au NPs@NDs | $1.62 \times 10^3$                 | $2.33 \times 10^4$ | $7.42 \times 10^4$ | $2.19 \times 10^5$ | $1.96 \times 10^5$ |
|                                   | $\text{NiO}$   | TF         | -                                  | $6.70 \times 10^5$ | $9.43 \times 10^4$ | $2.00 \times 10^4$ | $7.39 \times 10^3$ |
|                                   |                | NDs        | -                                  | $2.94 \times 10^7$ | $4.57 \times 10^6$ | $6.33 \times 10^5$ | $1.63 \times 10^5$ |
|                                   |                | Au NPs@NDs | -                                  | $1.20 \times 10^7$ | $1.36 \times 10^6$ | $2.15 \times 10^5$ | $6.11 \times 10^4$ |
| $\text{C}_6\text{H}_5\text{CH}_3$ | $\text{WO}_3$  | TF         | -                                  | -                  | $4.25 \times 10^7$ | $1.28 \times 10^7$ | $5.26 \times 10^6$ |
|                                   |                | NDs        | -                                  | -                  | $4.09 \times 10^6$ | $6.48 \times 10^7$ | $2.73 \times 10^7$ |
|                                   |                | Au NPs@NDs | $8.05 \times 10^7$                 | $6.16 \times 10^7$ | $5.38 \times 10^7$ | $3.20 \times 10^7$ | $2.47 \times 10^7$ |
|                                   | $\text{SnO}_2$ | TF         | -                                  | -                  | $3.88 \times 10^2$ | $4.51 \times 10^2$ | $4.66 \times 10^2$ |
|                                   |                | NDs        | $5.49 \times 10^6$                 | $8.20 \times 10^6$ | $3.68 \times 10^4$ | $2.33 \times 10^5$ | $2.98 \times 10^5$ |
|                                   |                | Au NPs@NDs | $3.06 \times 10^3$                 | $5.05 \times 10^3$ | $8.42 \times 10^4$ | $1.41 \times 10^5$ | $2.26 \times 10^5$ |
|                                   | $\text{NiO}$   | TF         | -                                  | $6.42 \times 10^6$ | $8.26 \times 10^4$ | $2.34 \times 10^4$ | $7.73 \times 10^3$ |
|                                   |                | NDs        | -                                  | -                  | $3.78 \times 10^6$ | $7.69 \times 10^5$ | $1.69 \times 10^5$ |
|                                   |                | Au NPs@NDs | $8.29 \times 10^7$                 | -                  | $1.21 \times 10^6$ | $2.46 \times 10^5$ | $6.42 \times 10^4$ |
| $\text{NH}_3$                     | $\text{WO}_3$  | TF         | -                                  | $7.50 \times 10^6$ | $8.82 \times 10^6$ | $5.00 \times 10^6$ | $2.15 \times 10^6$ |
|                                   |                | NDs        | -                                  | -                  | $3.39 \times 10^6$ | $2.56 \times 10^6$ | $1.42 \times 10^6$ |
|                                   |                | Au NPs@NDs | $2.15 \times 10^7$                 | $2.15 \times 10^7$ | $8.88 \times 10^6$ | $4.56 \times 10^6$ | $2.03 \times 10^6$ |
|                                   | $\text{SnO}_2$ | TF         | -                                  | -                  | $3.86 \times 10^2$ | $4.36 \times 10^2$ | $4.72 \times 10^2$ |
|                                   |                | NDs        | $3.87 \times 10^6$                 | $5.79 \times 10^6$ | $2.41 \times 10^4$ | $5.02 \times 10^4$ | $6.15 \times 10^4$ |
|                                   |                | Au NPs@NDs | $3.06 \times 10^3$                 | $4.44 \times 10^3$ | $7.30 \times 10^4$ | $1.75 \times 10^5$ | $2.59 \times 10^5$ |
|                                   | $\text{NiO}$   | TF         | -                                  | $3.88 \times 10^5$ | $1.06 \times 10^5$ | $2.32 \times 10^4$ | $7.69 \times 10^3$ |
|                                   |                | NDs        | -                                  | $1.62 \times 10^7$ | $8.93 \times 10^6$ | $7.89 \times 10^5$ | $1.65 \times 10^5$ |
|                                   |                | Au NPs@NDs | $8.08 \times 10^7$                 | $5.39 \times 10^6$ | $1.41 \times 10^6$ | $2.55 \times 10^5$ | $6.48 \times 10^4$ |
| $\text{H}_2\text{S}$              | $\text{WO}_3$  | TF         | -                                  | $4.76 \times 10^7$ | $3.57 \times 10^7$ | $1.96 \times 10^7$ | $8.54 \times 10^6$ |
|                                   |                | NDs        | -                                  | -                  | $1.20 \times 10^7$ | $9.53 \times 10^6$ | $6.23 \times 10^6$ |
|                                   |                | Au NPs@NDs | $4.29 \times 10^7$                 | $3.43 \times 10^7$ | $1.35 \times 10^7$ | $6.67 \times 10^6$ | $3.05 \times 10^6$ |
|                                   | $\text{SnO}_2$ | TF         | -                                  | $4.14 \times 10^2$ | $4.48 \times 10^2$ | $5.27 \times 10^2$ | $5.20 \times 10^2$ |
|                                   |                | NDs        | $1.40 \times 10^7$                 | $8.91 \times 10^6$ | $1.03 \times 10^7$ | $1.53 \times 10^7$ | $9.26 \times 10^6$ |
|                                   |                | Au NPs@NDs | $9.60 \times 10^3$                 | $5.74 \times 10^3$ | $9.38 \times 10^3$ | $1.88 \times 10^4$ | $1.51 \times 10^4$ |
|                                   | $\text{NiO}$   | TF         | -                                  | $5.18 \times 10^5$ | $8.51 \times 10^4$ | $2.02 \times 10^4$ | $8.32 \times 10^3$ |
|                                   |                | NDs        | -                                  | $1.97 \times 10^7$ | $3.00 \times 10^6$ | $5.48 \times 10^5$ | $1.67 \times 10^5$ |
|                                   |                | Au NPs@NDs | $3.13 \times 10^7$                 | $6.61 \times 10^6$ | $9.60 \times 10^5$ | $1.94 \times 10^5$ | $6.57 \times 10^4$ |

Table S1 Resistance of each sensors with operating temperatruue.

| $\Delta (E_{TF} - E_{NDs})$<br>(kJ/mol)       | WO <sub>3</sub> | SnO <sub>2</sub> | NiO   |
|-----------------------------------------------|-----------------|------------------|-------|
| CH <sub>3</sub> COCH <sub>3</sub>             | -15.9           | 4.67             | -14.8 |
| C <sub>6</sub> H <sub>5</sub> CH <sub>3</sub> | -46.3           | 0.902            | -28.9 |
| NH <sub>3</sub>                               | -14.2           | -1.92            | -13.2 |
| H <sub>2</sub> S                              | 10.0            | 6.22             | -12.1 |

**Table S2** Difference in the activation energy between TF and NDs ( $E_{TF} - E_{NDs}$ ) of each metal oxide and gas combination.
